# Supplementary material for: On the physical origin of the cation–anion intermediate bond in ionic liquids Part I. Placing a (weak) hydrogen bond between two charges
Source: Royal Society of Chemistry journal article supplement (doi:10.1039/b921246a), 2010-01-01
Supplement: b921246a.pdf [file b921246a.pdf]

# On the physical origin of the cation-anion intermediate bond in ionic liquids

## Part I. Placing a (weak) hydrogen bond between two charges.

Sebastian B. C. Lehmann, Martin Roatsch, Matthias Schöppke and Barbara Kirchner<sup>†,\*1</sup>

<sup>†</sup> Lehrstuhl für Theoretische Chemie, Wilhelm-Ostwald-Institut für Physikalische und  
Theoretische Chemie,  
Universität Leipzig, Linnéstr.2 , D-04103 Leipzig, Germany

## Electronic Supplementary Information

---

<sup>1</sup>Corresponding author: [bkirchner@uni-leipzig.de](mailto:bkirchner@uni-leipzig.de)

## SI Computational methodologies and systems investigated

Table S1: Ion pairs (IPs) that are studied in this work. Temperature in Kelvin. Data from Ref.<sup>1-4</sup>  
Viscosity  $\eta$  in cP, conductivity  $\Lambda$  in  $\text{Sm}^{-1}$ , density  $\rho$  in  $\text{g}/\text{cm}^3$ .

| IPs                                                 | $\eta$    | $T_m$        | $\Lambda$ | $\rho$ |
|-----------------------------------------------------|-----------|--------------|-----------|--------|
| [Na][Cl]                                            | –         | 1074         | –         | 2.17   |
| [Na][NO <sub>3</sub> ]                              | –         | 581          | –         | 2.26   |
| [Na][NTf <sub>2</sub> ]                             | –         | 507-511 (Li) | –         | –      |
| [Na][BF <sub>4</sub> ]                              | –         | 657          | –         | 2.47   |
| [NH <sub>4</sub> ][Cl]                              | –         | 608          | –         | 1.52   |
| [NH <sub>4</sub> ][NO <sub>3</sub> ]                | –         | 442          | –         | 1.72   |
| [NH <sub>4</sub> ][NTf <sub>2</sub> ]               | –         | –            | –         | –      |
| [NH <sub>4</sub> ][BF <sub>4</sub> ]                | –         | 503          | –         | 1.87   |
| [EtNH <sub>3</sub> ][Cl]                            | –         | 378-381      | –         | –      |
| [EtNH <sub>3</sub> ][NO <sub>3</sub> ] <sup>5</sup> | 32(300 K) | 288          | 0.0269    | 1.216  |
| [EtNH <sub>3</sub> ][NTf <sub>2</sub> ]             | –         | –            | –         | –      |
| [EtNH <sub>3</sub> ][BF <sub>4</sub> ]              | –         | –            | –         | –      |
| [Emim][Cl]                                          | –         | 358          | –         | 1.186  |
| [Emim][NO <sub>3</sub> ]                            | –         | 311 / 284    | –         | 1.28   |
| [Emim][NTf <sub>2</sub> ]                           | 32.6      | 255          | 0.91      | 1.53   |
| [Emim][BF <sub>4</sub> ]                            | 43        | 288          | 1.553     | 1.280  |

The different ion pairs studied in this work are listed in table S1 together with some of their physical properties.

## SII Dependence of intermediate bond on applied methodology

Table S2: Bond length  $r(\text{XH})$  in pm and counterpoise-corrected interaction energies  $\Delta E^{\text{cp}}$  for different methods and basis sets. All energies are given in [kJ/mol].  $\Delta r(\text{XH})$  is the bond elongation taking the difference between complex and isolated cation.

| method | basis | $r(\text{XH})$                          | $\Delta r(\text{XH})$ | $\Delta E^{\text{cp}}$ | $r(\text{XH})$            | $\Delta r(\text{XH})$ | $\Delta E^{\text{cp}}$ |
|--------|-------|-----------------------------------------|-----------------------|------------------------|---------------------------|-----------------------|------------------------|
|        |       | [EtNH <sub>3</sub> ][Cl]                |                       |                        | [Emim][Cl]                |                       |                        |
| HF     | 3-21G | 108.52                                  | 6.74                  | -456.0                 | 108.26                    | 2.01                  | -375.8                 |
| HF     | TZVPP | 198.87                                  | 98.15                 | -473.0                 | 108.85                    | 2.24                  | -374.7                 |
| BLYP-D | TZVPP | 155.94                                  | 52.95                 | -530.9                 | 113.15                    | 5.22                  | -407.2                 |
| MP2    | TZVPP | 159.79                                  | 57.85                 | -519.8                 | 111.94                    | 4.79                  | -400.5                 |
|        |       | [EtNH <sub>3</sub> ][NO <sub>3</sub> ]  |                       |                        | [Emim][NO <sub>3</sub> ]  |                       |                        |
| HF     | 3-21G | 143.74                                  | 41.96                 | -467.9                 | 108.36                    | 2.11                  | -375.0                 |
| HF     | TZVPP | 178.22                                  | 77.50                 | -472.1                 | 107.43                    | 0.82                  | -364.1                 |
| BLYP-D | TZVPP | 159.28                                  | 56.29                 | -513.7                 | 110.21                    | 2.28                  | -386.5                 |
| MP2    | TZVPP | 158.20                                  | 56.26                 | -505.0                 | 107.36                    | 0.21                  | -386.5                 |
|        |       | [EtNH <sub>3</sub> ][NTf <sub>2</sub> ] |                       |                        | [Emim][NTf <sub>2</sub> ] |                       |                        |
| HF     | 3-21G | 104.77                                  | 2.99                  | -403.2                 | 107.53                    | 1.28                  | -322.9                 |
| HF     | TZVPP | 102.48                                  | 1.76                  | -363.3                 | 107.39                    | 0.76                  | -302.8                 |
| BLYP-D | TZVPP | 112.45                                  | 9.46                  | -416.5                 | 110.08                    | 2.15                  | -339.2                 |
| MP2    | TZVPP | 108.33                                  | 6.39                  | -406.1                 | 108.71                    | 1.56                  | -331.1                 |
|        |       | [EtNH <sub>3</sub> ][BF <sub>4</sub> ]  |                       |                        | [Emim][BF <sub>4</sub> ]  |                       |                        |
| HF     | 3-21G | 103.23                                  | 1.45                  | -419.5                 | 106.30                    | 0.05                  | -337.2                 |
| HF     | TZVPP | 101.72                                  | 1.00                  | -416.1                 | 106.76                    | 0.15                  | -343.4                 |
| BLYP-D | TZVPP | 105.88                                  | 2.85                  | -457.5                 | 108.53                    | 0.60                  | -378.3                 |
| MP2    | TZVPP | 104.11                                  | 2.17                  | -444.4                 | 107.59                    | 0.44                  | -362.0                 |

In table S2 the binding energies  $\Delta E^{\text{cp}}$  are shown. The applied HF calculations fail in several cases (mostly PILs) to obtain the complex geometry the other methods end up in. In order to verify the failure of the Hartree–Fock results we started these geometry optimizations also from the MP2/TZVPP geometries and obtained the same differing results. Even the

cases where a similar geometry of HF compared to the other methods is obtained, the HF bond elongations are different from the other methods. Additionally, the deviation between the MP2 and the HF calculations can be as large as 60 kJ/mol stressing the importance of proper treatment of the dispersion effects in ILs.

### SIII The role of charge transfer

Table S3: Interaction energies  $\Delta E^{\text{CP}}$  and zero-point energy corrected interaction energy  $\Delta E_{\text{ZPE}}^{\text{CP}}$  are given in kJ/mol and contact distances of ion pairs (IPs) are given in pm, for definition see section 2. The angle  $a(\text{XHY})$  is also given in degrees.  $\Delta r(\text{XH})$  gives the difference for  $r(\text{XH})$  of complex minus isolated cation. All data obtained from MP2/TZVPP optimizations.

| IPs                             | $\Delta E^{\text{CP}}$ | $\Delta E_{\text{ZPE}}^{\text{CP}}$ | $r(\text{XH})$ | $r(\text{XY})$ | $r(\text{HY})$ | $a(\text{XHY})$ | $\Delta r(\text{XH})$ |
|---------------------------------|------------------------|-------------------------------------|----------------|----------------|----------------|-----------------|-----------------------|
| $[\text{NH}_3][\text{HCl}]$     | -571.6                 | -583.8                              | 176.47         | 308.24         | 131.78         | 179.8           | 74.56                 |
| $[\text{NH}_3][\text{HNO}_3]$   | -469.2                 | -                                   | 166.46         | 268.07         | 101.62         | 179.0           | 64.51                 |
| $[\text{NH}_3][\text{HNTf}_2]$  | -435.3                 | -472.3                              | 159.64         | 268.44         | 108.86         | 177.5           | 57.69                 |
| $[\text{EtNH}_2][\text{HCl}]$   | -519.8                 | -533.7                              | 159.79         | 295.03         | 135.67         | 160.6           | 57.85                 |
| $[\text{EtNH}_2][\text{HNO}_3]$ | -505.0                 | -507.1                              | 158.20         | 261.92         | 103.82         | 176.9           | 56.23                 |

Table S4: NPA charges in a.u. on contact atoms of the hydrogen bond and net charge transferred (NCT) to the hydrogen bond donor. All data obtained from MP2/TZVPP.

| IPs                             | X       | H      | Y       | NCT     |
|---------------------------------|---------|--------|---------|---------|
| $[\text{NH}_3][\text{HCl}]$     | -1.0244 | 0.2934 | -0.3747 | -0.6253 |
| $[\text{NH}_3][\text{HNO}_3]$   | -1.0417 | 0.5270 | -0.5594 | -0.7658 |
| $[\text{NH}_3][\text{HNTf}_2]$  | -1.2623 | 0.4976 | -1.0225 | -0.1097 |
| $[\text{EtNH}_2][\text{HCl}]$   | -0.4403 | 0.3322 | -0.8073 | -0.1081 |
| $[\text{EtNH}_2][\text{HNO}_3]$ | -0.5674 | 0.5206 | -0.8314 | -0.1017 |

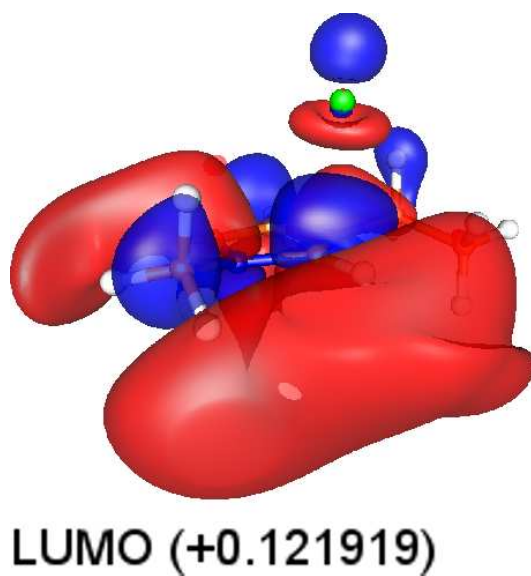

Figure S1: LUMO orbitals of [Emim][Cl] on-top. The numbers in parenthesis are the orbital energies in atomic units.

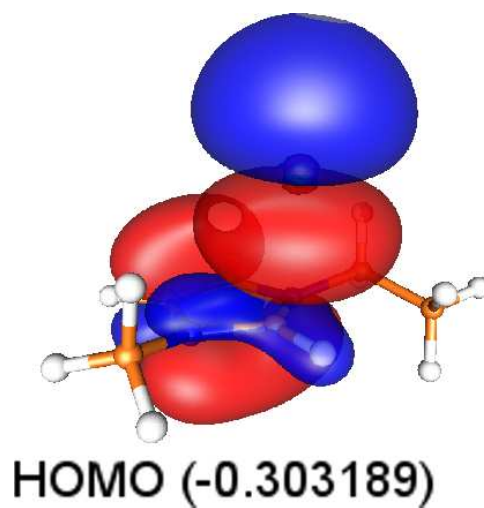

Figure S2: HOMO orbitals of [Emim][Cl] on-top. The numbers in parenthesis are the orbital energies in atomic units.

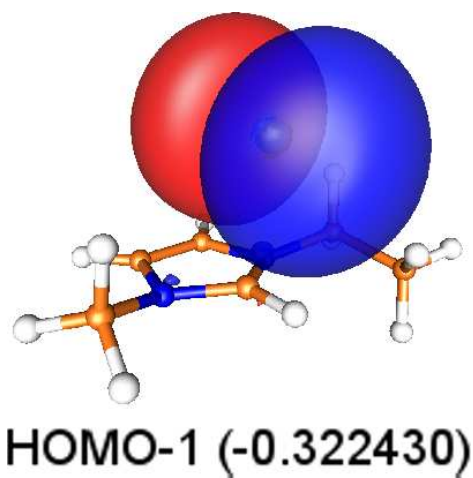

Figure S3: HOMO-1 orbitals of [Emim][Cl] on-top. The numbers in parenthesis are the orbital energies in atomic units.

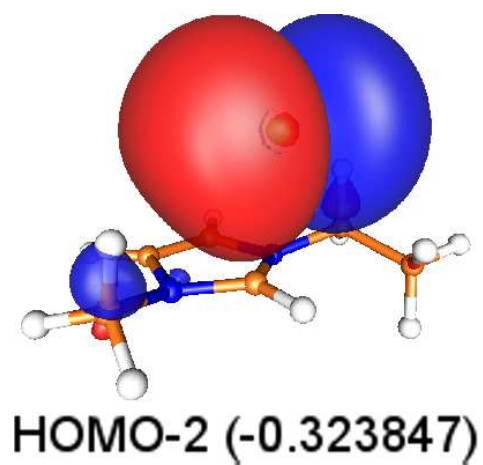

Figure S4: HOMO-2 orbitals of [Emim][Cl] on-top. The numbers in parenthesis are the orbital energies in atomic units.

## SIV Potential energy surfaces and forces

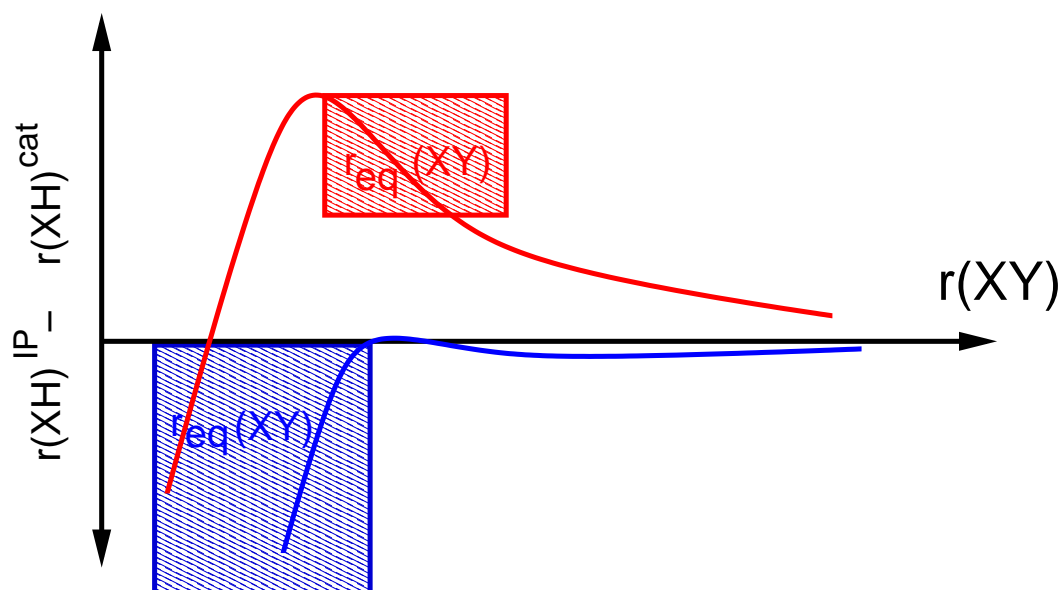

Figure S5: Schematical drawing of  $r(XH)$  bond elongation from isolated cation (cat) to ion pair complex (IP) against the  $r(XY)$  distance. Red: Traditional hydrogen bond; Blue: Weak hydrogen bond. The squared box indicates at which  $XY$  distances the complex can exhibit the equilibrium distance  $r_{eq}(XY)$ .

## References

- [1] Wasserscheid, E.; Welton, T. *Ionic Liquids in Synthesis*; VCH-Wiley: Weinheim, 2003.
- [2] Wasserscheid, P.; Keim, W. *Angew. Chem. Int. Ed.* **2000**, *39*, 3772–3789.
- [3] M. Frenkel,, Ed.; *NIST Ionic Liquids Database, NIST Standard Reference Database Number 147*; National Institute of Standards and Technology, Gaithersburg MD, 20899.: 2009.
- [4] David R. Lide,, Ed.; *Chemical Rubber Company Handbook of chemistry and physics*; CRC Press, Boca Raton, FL 33487.: 2008.
- [5] Greaves, T. L.; Weerawardena, A.; Fong, C.; Krodkiewska, I.; Drummond, C. J. *J. Phys. Chem. B* **2006**, *110*, 22481–22487.
